# Supplementary material for: MetaSpot: A General Approach for Recognizing the Reactive Atoms Undergoing Metabolic Reactions Based on the MetaQSAR Database
Source: MDPI journal article supplement (doi:10.3390/ijms241311064), 2023-07-04
Supplement: s1 [file s1]

# MetaSpot: a general approach for recognizing the reactive atoms undergoing metabolic reactions based on the MetaQSAR database

Angelica Mazzolari, Pietro Perazzoni, Emanuela Sabato, Filippo Lunghini, Andrea R. Beccari, Giulio Vistoli and Alessandro Pedretti

## SUPPORTING INFORMATION

**Table S1:** Performance metrics (Accuracy, MCC and AUC values) for the 17 considered classes of metabolic reactions in the first round of predictions. For each metric, the reported mean and range values are derived by repeating 100 times the random undersampling of the NR atoms.

| Class ID            | Cases | Description                                   | Accuracy    |             | MCC         |             | AUC         |             |
|---------------------|-------|-----------------------------------------------|-------------|-------------|-------------|-------------|-------------|-------------|
|                     |       |                                               | Mean        | Range       | Mean        | Range       | Mean        | Range       |
| 01                  | 3050  | Oxidation of Csp3                             | 0.85        | 0.005       | 0.72        | 0.04        | 0.87        | 0.03        |
| 02                  | 1798  | Oxidation of Csp2 and Csp                     | 0.81        | 0.008       | 0.63        | 0.07        | 0.83        | 0.06        |
| 03                  | 278   | CHOH $\leftrightarrow$ C=O $\rightarrow$ COOH | 0.90        | 0.02        | 0.80        | 0.19        | 0.95        | 0.06        |
| 05                  | 252   | Redox reactions of R3N                        | 0.94        | 0.02        | 0.89        | 0.14        | 0.98        | 0.05        |
| 06                  | 330   | Redox reactions of >NH, >NOH, and –N=O        | 0.93        | 0.01        | 0.86        | 0.12        | 0.97        | 0.03        |
| 07                  | 198   | Redox of quinones or analogues                | 0.74        | 0.03        | 0.48        | 0.30        | 0.81        | 0.16        |
| 08                  | 274   | Redox of S atoms                              | 0.95        | 0.01        | 0.89        | 0.09        | 0.98        | 0.04        |
| <b>Main class 1</b> |       | Redox reactions                               | <b>0.87</b> | <b>0.01</b> | <b>0.75</b> | <b>0.14</b> | <b>0.91</b> | <b>0.06</b> |
| 11                  | 534   | Hydrolysis of esters and lactones             | 0.96        | 0.01        | 0.92        | 0.09        | 0.98        | 0.02        |
| 12                  | 258   | Hydrolysis of amides, lactams and peptides    | 0.92        | 0.02        | 0.83        | 0.21        | 0.97        | 0.06        |
| 14                  | 168   | Other hydrolyses                              | 0.73        | 0.03        | 0.46        | 0.33        | 0.80        | 0.18        |
| <b>Main class 2</b> |       | Hydrolyses                                    | <b>0.87</b> | <b>0.02</b> | <b>0.74</b> | <b>0.21</b> | <b>0.92</b> | <b>0.09</b> |
| 21                  | 800   | O-glucuronidations and glycosylations         | 0.96        | 0.005       | 0.92        | 0.05        | 0.96        | 0.04        |
| 22                  | 298   | N- and S-glucuronidations and glycosilations  | 0.94        | 0.01        | 0.88        | 0.15        | 0.95        | 0.06        |
| 23                  | 244   | Sulfonations                                  | 0.94        | 0.02        | 0.89        | 0.18        | 0.97        | 0.07        |

|                      |     |                                             |             |             |             |             |             |             |
|----------------------|-----|---------------------------------------------|-------------|-------------|-------------|-------------|-------------|-------------|
| 24                   | 320 | GSH and RSH conjugations                    | 0.86        | 0.02        | 0.71        | 0.14        | 0.92        | 0.05        |
| 25                   | 140 | Acetylations and acylations                 | 0.94        | 0.02        | 0.88        | 0.24        | 0.98        | 0.05        |
| 26                   | 130 | CoASH-ligation plus amino acid conjugations | 0.95        | 0.02        | 0.90        | 0.15        | 0.98        | 0.04        |
| 27                   | 110 | Methylations                                | 0.89        | 0.04        | 0.78        | 0.33        | 0.93        | 0.13        |
| <b>Main class 3</b>  |     | <b>Conjugations</b>                         | <b>0.93</b> | <b>0.02</b> | <b>0.85</b> | <b>0.18</b> | <b>0.96</b> | <b>0.06</b> |
| <b>Overall means</b> |     |                                             | <b>0.89</b> | <b>0.02</b> | <b>0.79</b> | <b>0.17</b> | <b>0.93</b> | <b>0.07</b> |

**Table S2:** Descriptors selected by the feature importance analyses for the models developed for the 17 considered classes of metabolic reactions in the first round of predictions (here and in the following Tables the prefixes Atm and Mol stand for atom- and ligand-based descriptors).

| Class ID | Description                                   | Selected Features                                                                                                             |
|----------|-----------------------------------------------|-------------------------------------------------------------------------------------------------------------------------------|
| 01       | Oxidation of Csp3                             | Atm_Broto, Atm_Kier, Mol_HbDon                                                                                                |
| 02       | Oxidation of Csp2 and Csp                     | Atm_Kier, Mol_HbDon                                                                                                           |
| 03       | CHOH $\leftrightarrow$ C=O $\rightarrow$ COOH | Atm_Broto, Atm_Kier, Atm_Charge, Atm_q(r)-Z(r), Atm_Lumo+1, Mol_Lipole                                                        |
| 05       | Redox reactions of R3N                        | Atm_Broto, Atm_Dn(r), Atm_Homo-1, Mol_Rotors                                                                                  |
| 06       | Redox reactions of >NH, >NOH, and -N=O        | Atm_Kier, Atm_piS(r), Atm_Homo-1, Atm_Lumo+1, Mol_Atoms, Mol_HeavyAtoms, Mol_Ovality, Mol_PSA                                 |
| 07       | Redox of quinones or analogues                | Atm_Broto, Atm_piS(r), Mol_HbAcc, Mol_HbDon, Mol_Improper, Mol_Surface                                                        |
| 08       | Redox of S atoms                              | Atm_Broto, Atm_Kier, Atm_piS(r), Mol_Gyrrad, Mol_Lipole                                                                       |
| 11       | Hydrolysis of esters and lactones             | Atm_Broto, Atm_Kier, Atm_Charge, Atm_Dn(r), Mol_Dipole, Mol_Improper, Mol_Sas                                                 |
| 12       | Hydrolysis of amides, lactams and peptides    | Atm_Broto, Atm_Kier, Atm_piS(r), Mol_Rotors, Mol_Gyrrad, Mol_LogP                                                             |
| 14       | Other hydrolyses                              | Atm_Kier, Atm_q(r)-Z(r), Atm_piS(r), Atm_Lumo, Mol_Gyrrad, Mol_HbDon                                                          |
| 21       | O-glucuronidations and glycosylations         | Atm_Kier                                                                                                                      |
| 22       | N-/S-glucuronidations/glycosylations          | Atm_Broto                                                                                                                     |
| 23       | Sulfonations                                  | Atm_Kier, Mol_HbAcc                                                                                                           |
| 24       | GSH and RSH conjugations                      | Atm_Broto, Atm_Charge, Atm_piS(r), Mol_Improper                                                                               |
| 25       | Acetylations and acylations                   | Atm_Kier, Atm_piS(r), Mol_Improper                                                                                            |
| 26       | CoASH-ligation plus amino acid conjugations   | Atm_Broto, Atm_Kier, Atm_Charge, Atm_piS(r), Atm_Lumo+1, Mol_Gyrrad, Mol_HbAcc, Mol_HbDon, Mol_Improper, Mol_LogP, Mol_Volume |
| 27       | Methylations                                  | Atm_Broto, Atm_q(r)-Z(r), Mol_Rotors, Mol_HbAcc, Mol_HeavyAtoms, Mol_Mass                                                     |

**Table S3:** Performance metrics (Accuracy, MCC and AUC values) for the 17 considered classes of metabolic reactions as derived by the second round of predictions in which the NR atoms are purposely selected to have the same atom type(s) of the reactive centers. The differences compared to the first round in accuracy and MCC values are also reported.

| Class ID             | Description                                   | Accuracy    | MCC         | AUC         | $\Delta$ MCC | $\Delta$ Accuracy |
|----------------------|-----------------------------------------------|-------------|-------------|-------------|--------------|-------------------|
| 01                   | Oxidation of Csp3                             | 0.87        | 0.75        | 0.93        | +0.03        | +0.03             |
| 02                   | Oxidation of Csp2 and Csp                     | 0.90        | 0.79        | 0.93        | +0.16        | +0.09             |
| 03                   | CHOH $\leftrightarrow$ C=O $\rightarrow$ COOH | 0.83        | 0.65        | 0.89        | -0.15        | -0.04             |
| 05                   | Redox reactions of R3N                        | 0.71        | 0.41        | 0.78        | -0.48        | -0.19             |
| 06                   | Redox reactions of >NH, >NOH, and -N=O        | 0.69        | 0.38        | 0.75        | -0.48        | -0.25             |
| 07                   | Redox of quinones or analogues                | 0.80        | 0.60        | 0.91        | +0.12        | +0.06             |
| 08                   | Redox of S atoms                              | 0.83        | 0.59        | 0.87        | -0.30        | -0.09             |
| <b>Main class 1</b>  | <b>Redox reactions</b>                        | <b>0.80</b> | <b>0.60</b> | <b>0.86</b> | <b>-0.16</b> | <b>-0.06</b>      |
| 11                   | Hydrolysis of esters and lactones             | 0.74        | 0.47        | 0.83        | -0.45        | -0.22             |
| 12                   | Hydrolysis of amides, lactams and peptides    | 0.78        | 0.55        | 0.83        | -0.28        | -0.14             |
| 14                   | Other hydrolyses                              | 0.76        | 0.52        | 0.85        | +0.06        | +0.03             |
| <b>Main class 2</b>  | <b>Hydrolyses</b>                             | <b>0.76</b> | <b>0.51</b> | <b>0.84</b> | <b>-0.22</b> | <b>-0.11</b>      |
| 21                   | O-glucuronidations and glycosylations         | 0.58        | 0.15        | 0.61        | -0.77        | -0.38             |
| 22                   | N-/S-glucuronidations/glycosylations          | 0.54        | 0.07        | 0.59        | -0.81        | -0.40             |
| 23                   | Sulfonations                                  | 0.71        | 0.42        | 0.75        | -0.47        | -0.23             |
| 24                   | GSH and RSH conjugations                      | 0.78        | 0.56        | 0.89        | -0.15        | -0.08             |
| 25                   | Acetylations and acylations                   | 0.73        | 0.46        | 0.79        | -0.42        | -0.22             |
| 26                   | CoASH-ligation plus amino acid conjugations   | 0.88        | 0.77        | 0.96        | -0.13        | -0.07             |
| 27                   | Methylations                                  | 0.76        | 0.52        | 0.81        | -0.26        | -0.13             |
| <b>Main class 3</b>  | <b>Conjugations</b>                           | <b>0.71</b> | <b>0.42</b> | <b>0.77</b> | <b>-0.43</b> | <b>-0.22</b>      |
| <b>Overall means</b> |                                               | <b>0.76</b> | <b>0.51</b> | <b>0.82</b> | <b>-0.27</b> | <b>-0.13</b>      |

**Table S4:** Descriptors selected by the feature importance analyses for the models developed for the 17 considered classes of metabolic reactions in the first round of predictions.

| Class ID | Description                                                      | Selected Features                                                                        |
|----------|------------------------------------------------------------------|------------------------------------------------------------------------------------------|
| 01       | Oxidation of Csp3                                                | Atm_piS(r), Mol_Dipole, Mol_Lipole, Mol_Mass, Mol_Ovality, Mol_PSA, Mol_LogP, Mol_Volume |
| 02       | Oxidation of Csp2 and Csp                                        | Atm_Charge, Atm_piS(r), Mol_Improper, Mol_PSA, Mol_LogP                                  |
| 03       | $\text{CHOH} \leftrightarrow \text{C=O} \rightarrow \text{COOH}$ | Atm_Charge, Atm_q(r)-Z(r), Mol_Lipole, Mol_Mass, Mol_PSA                                 |
| 05       | Redox reactions of R3N                                           | Atm_Charge, Atm_piS(r), Mol_Dipole, Mol_Surface                                          |
| 06       | Redox reactions of >NH, >NOH, and -N=O                           | Atm_Charge, Atm_Homo-1, Mol_HbAcc, Mol_Improper, Mol_PSA                                 |
| 07       | Redox of quinones or analogues                                   | Atm_Homo-1, Atm_Lumo, Mol_Atoms, Mol_Dipole, Mol_HbDon, Mol_Sav                          |
| 08       | Redox of S atoms                                                 | Atm_Dn(r), Atm_q(r)-Z(r), Atm_Homo, Mol_HbDon, Mol_PSA                                   |
| 11       | Hydrolysis of esters and lactones                                | Atm_Charge, Atm_piS(r), Atm_Homo-1, Mol_Improper, Mol_Mass, Mol_PSA                      |
| 12       | Hydrolysis of amides, lactams and peptides                       | Atm_piS(r), Mol_Gyrrad, Mol_Improper, Mol_PSA                                            |
| 14       | Other hydrolyses                                                 | Mol_Gyrrad, Mol_Improper, Mol_Lipole, Mol_PSA, Mol_LogP                                  |
| 21       | O-glucuronidations and glycosylations                            | Atm_De(r), Mol_HbDon                                                                     |
| 22       | N-/S-glucuronidations/glycosylations                             | Mol_Atoms, Mol_Dipole, Mol_LogP                                                          |
| 23       | Sulfonations                                                     | Atm_Dn(r), Atm_Homo, Mol_Rotors, Mol_Gyrrad, Mol_HbDon, Mol_PSA                          |
| 24       | GSH and RSH conjugations                                         | Atm_Dn(r), Atm_Lumo, Mol_Atoms, Mol_Gyrrad                                               |
| 25       | Acetylations and acylations                                      | Atm_Charge, Atm_Dn(r), Atm_Lumo, Mol_PSA                                                 |
| 26       | CoASH-ligation plus amino acid conjugations                      | Atm_Charge, Atm_piS(r), Atm_Lumo+1                                                       |
| 27       | Methylations                                                     | Mol_Atoms, Mol_Rotors, Mol_Gyrrad, Mol_HbAcc, Mol_Lipole                                 |

**Table S5:** Performance metrics (Accuracy, MCC and AUC values) for the considered subclasses of metabolic reactions. For each metric, the mean and range values are derived by repeating 100 times the random undersampling of the NR atoms.

| Subclass ID         | Description                                           | Cases | Accuracy    |             | MCC         |             | AUC         |             |
|---------------------|-------------------------------------------------------|-------|-------------|-------------|-------------|-------------|-------------|-------------|
|                     |                                                       |       | Mean        | Range       | Mean        | Range       | Mean        | Range       |
| 01.01               | Oxidations of isolated Csp <sup>3</sup>               | 193   | 0.84        | 0.08        | 0.70        | 0.03        | 0.90        | 0.06        |
| 01.02               | Oxidations of C in $\alpha$ to an unsaturated system  | 233   | 0.92        | 0.05        | 0.84        | 0.10        | 0.96        | 0.04        |
| 01.03               | Oxidations of Csp <sup>3</sup> carrying an heteroatom | 492   | 0.90        | 0.04        | 0.81        | 0.09        | 0.94        | 0.04        |
| 01.04               | Dehydrogenations                                      | 81    | 0.79        | 0.14        | 0.58        | 0.27        | 0.83        | 0.14        |
| 02.01               | Oxidations of aryl compounds                          | 440   | 0.82        | 0.04        | 0.63        | 0.08        | 0.82        | 0.07        |
| 02.02               | Oxidations of azarenes                                | 94    | 0.88        | 0.13        | 0.77        | 0.26        | 0.93        | 0.10        |
| 02.03               | Oxidations of $>C=C<$                                 | 55    | 0.90        | 0.13        | 0.79        | 0.26        | 0.94        | 0.09        |
| 03.02               | Hydrogenations of carbonyls                           | 71    | 0.95        | 0.09        | 0.89        | 0.18        | 0.97        | 0.05        |
| 05.01               | Oxidations of tertiary alkylamines                    | 65    | 0.95        | 0.08        | 0.91        | 0.16        | 0.99        | 0.04        |
| 06.01               | Hydroxylations of amines                              | 62    | 0.98        | 0.05        | 0.96        | 0.11        | 0.99        | 0.01        |
| 07.04               | Oxidations of phenols                                 | 51    | 0.73        | 0.25        | 0.45        | 0.50        | 0.79        | 0.26        |
| 08.03               | Oxygenations of sulfides                              | 83    | 0.99        | 0.05        | 0.97        | 0.08        | 0.99        | 0.02        |
| <b>Main class 1</b> | <b>Average</b>                                        |       | <b>0.89</b> | <b>0.09</b> | <b>0.78</b> | <b>0.18</b> | <b>0.92</b> | <b>0.08</b> |
| 11.01               | Hydrolysis of alkyl esters                            | 103   | 0.98        | 0.06        | 0.95        | 0.11        | 0.99        | 0.05        |
| 11.03               | Hydrolysis of anionic and cationic esters             | 100   | 0.97        | 0.07        | 0.93        | 0.13        | 0.98        | 0.06        |
| 11.08               | Hydrolysis of esters of inorganic acids               | 51    | 0.91        | 0.18        | 0.81        | 0.35        | 0.97        | 0.08        |
| 12.02               | Hydrolysis of anilides and hydrazides                 | 55    | 0.93        | 0.13        | 0.85        | 0.26        | 0.97        | 0.08        |
| <b>Main class 2</b> | <b>Average</b>                                        |       | <b>0.94</b> | <b>0.11</b> | <b>0.88</b> | <b>0.21</b> | <b>0.98</b> | <b>0.07</b> |
| 21.01               | O-glucuronidation of alcohols                         | 85    | 0.97        | 0.05        | 0.94        | 0.11        | 0.97        | 0.07        |
| 21.02               | O-glucuronidation of phenols                          | 152   | 0.94        | 0.05        | 0.92        | 0.10        | 0.98        | 0.04        |
| 21.03               | O-glucuronidation of carboxylic acids                 | 99    | 0.96        | 0.08        | 0.92        | 0.16        | 0.99        | 0.03        |
| 22.01               | N-glucuronidation of linear and cyclic amines         | 97    | 0.95        | 0.09        | 0.90        | 0.19        | 0.97        | 0.07        |
| 23.01               | O-sulfonation of phenols                              | 70    | 0.94        | 0.17        | 0.88        | 0.34        | 0.97        | 0.08        |
| 24.01               | Nucleophilic additions of glutathione                 | 89    | 0.88        | 0.11        | 0.76        | 0.23        | 0.94        | 0.07        |
| 24.02               | Reactions of glutathione addition-elimination         | 68    | 0.81        | 0.13        | 0.61        | 0.29        | 0.77        | 0.19        |
| <b>Main class 3</b> | <b>Average</b>                                        |       | <b>0.92</b> | <b>0.10</b> | <b>0.85</b> | <b>0.20</b> | <b>0.94</b> | <b>0.08</b> |

**Table S6:** Descriptors selected by the feature importance analyses for the models developed for the considered subclasses of metabolic reactions in the first round of predictions.

| Subclass ID | Description                                           | Accuracy                                                                                                     |
|-------------|-------------------------------------------------------|--------------------------------------------------------------------------------------------------------------|
| 01.01       | Oxidations of isolated Csp <sup>3</sup>               | Atm_Broto, Atm_Kier, Atm_Charge, Atm_Dn(r), Atm_piS(r), Atm_Homo, Atm_Lumo+1, Mol_Atoms, Mol_Improper        |
| 01.02       | Oxidations of C in $\alpha$ to an unsaturated system  | Atm_Broto, Atm_Charge, Atm_piS(r), Mol_Rotors, Mol_HbDon                                                     |
| 01.03       | Oxidations of Csp <sup>3</sup> carrying an heteroatom | Atm_Kier, Atm_Charge, Atm_piS(r), Atm_Homo-1, Mol_Atoms, Mol_HbAcc, Mol_HeavyAtoms, Mol_Mass                 |
| 01.04       | Dehydrogenations                                      | Atm_Broto, Atm_Charge, Atm_q(r)-Z(r), Atm_piS(r), Atm_Lumo+1, Mol_HbDon, Mol_Mass, Mol_Volume                |
| 02.01       | Oxidations of aryl compounds                          | Atm_Broto, Mol_HbDon                                                                                         |
| 02.02       | Oxidations of azarenes                                | Atm_Broto, Atm_Kier, Atm_Charge, Atm_Dn(r), Atm_De(r), Atm_piS(r), Atm_Homo-1, Mol_Dipole, Mol_Sav           |
| 02.03       | Oxidations of $>C=C<$                                 | Atm_Broto, Atm_Kier, Atm_Dn(r), Atm_piS(r), Atm_Homo-1, Mol_Rotors                                           |
| 03.02       | Hydrogenations of carbonyls                           | Atm_Broto, Atm_Kier, Atm_Charge, Atm_De(r), Mol_Lipole                                                       |
| 05.01       | Oxidations of tertiary alkylamines                    | Atm_Kier, Atm_Homo-1, Mol_Dipole, Mol_Rotors, Mol_HbAcc, Mol_PSA                                             |
| 06.01       | Hydroxylations of amines                              | Atm_Broto, Atm_Kier, Atm_Charge                                                                              |
| 07.04       | Oxidations of phenols                                 | Atm_Broto, Atm_Kier, Atm_Charge, Mol_HeavyAtoms, Mol_Volume                                                  |
| 08.03       | Oxygenations of sulfides                              | Atm_Broto, Atm_Kier, Atm_Charge, Atm_piS(r), Atm_Homo, Mol_Atoms, Mol_HbAcc                                  |
| 11.01       | Hydrolysis of alkyl esters                            | Atm_Kier, Atm_Charge, Mol_HbAcc                                                                              |
| 11.03       | Hydrolysis of anionic and cationic esters             | Atm_Broto, Atm_Charge, Mol_Dipole                                                                            |
| 11.08       | Hydrolysis of esters of inorganic acids               | Atm_Kier, Atm_Lumo, Atm_Lumo+1, Mol_Atoms, Mol_Lipole                                                        |
| 12.02       | Hydrolysis of anilides and hydrazides                 | Atm_Broto, Atm_Charge, Atm_q(r)-Z(r)                                                                         |
| 21.01       | O-glucuronidation of alcohols                         | Atm_Broto, Atm_Kier                                                                                          |
| 21.02       | O-glucuronidation of phenols                          | Atm_Broto, Atm_Kier, Mol_HbAcc, Mol_HbDon                                                                    |
| 21.03       | O-glucuronidation of carboxylic acids                 | Atm_Broto, Atm_Kier, Atm_Homo                                                                                |
| 22.01       | N-glucuronidation of linear and cyclic amines         | Atm_Kier, Atm_Charge, Atm_piS(r), Atm_Homo, Atm_Lumo+1, Mol_Dipole, Mol_Rotors, Mol_HeavyAtoms, Mol_Improper |
| 23.01       | O-sulfonation of phenols                              | Atm_Broto, Atm_Kier, Atm_q(r)-Z(r), Mol_Gyrrad                                                               |
| 24.01       | Nucleophilic additions of glutathione                 | Atm_Broto, Atm_Kier, Atm_Charge, Atm_piS(r), Atm_Lumo+1, Mol_Improper                                        |
| 24.02       | Reactions of glutathione addition-elimination         | Atm_Broto                                                                                                    |

**Table S7:** Performance metrics (Accuracy, MCC and AUC values) for the considered subclasses of metabolic reactions as derived by the second round of predictions in which the NR atoms are purposely selected to have the same atom type(s) of the reactive centers. The differences with the first round in accuracy and MCC values are also reported.

| Subclass ID         | Description                                           | Accuracy    | MCC         | AUC         | $\Delta$ Accuracy | $\Delta$ MCC |
|---------------------|-------------------------------------------------------|-------------|-------------|-------------|-------------------|--------------|
| 01.01               | Oxidations of isolated Csp <sup>3</sup>               | 0.87        | 0.73        | 0.93        | +0.03             | +0.02        |
| 01.02               | Oxidations of C in $\alpha$ to an unsaturated system  | 0.85        | 0.68        | 0.92        | -0.07             | -0.16        |
| 01.03               | Oxidations of Csp <sup>3</sup> carrying an heteroatom | 0.86        | 0.71        | 0.90        | -0.04             | -0.10        |
| 01.04               | Dehydrogenations                                      | 0.82        | 0.65        | 0.88        | +0.03             | +0.07        |
| 02.01               | Oxidations of aryl compounds                          | 0.88        | 0.75        | 0.92        | +0.06             | +0.12        |
| 02.02               | Oxidations of azarenes                                | 0.91        | 0.82        | 0.97        | +0.03             | +0.07        |
| 02.03               | Oxidations of $>C=C<$                                 | 0.75        | 0.50        | 0.84        | -0.15             | -0.29        |
| 03.02               | Hydrogenations of carbonyls                           | 0.75        | 0.50        | 0.82        | -0.20             | -0.39        |
| 05.01               | Oxidations of tertiary alkylamines                    | 0.72        | 0.43        | 0.82        | -0.15             | -0.49        |
| 06.01               | Hydroxylations of amines                              | 0.93        | 0.87        | 0.98        | -0.05             | -0.09        |
| 07.04               | Oxidations of phenols                                 | 0.82        | 0.66        | 0.85        | +0.09             | +0.19        |
| 08.03               | Oxygenations of sulfides                              | 0.84        | 0.69        | 0.84        | -0.15             | -0.27        |
| <b>Main class 1</b> | <b>Average</b>                                        | <b>0.83</b> | <b>0.66</b> | <b>0.89</b> | <b>-0.06</b>      | <b>-0.11</b> |
| 11.01               | Hydrolysis of alkyl esters                            | 0.73        | 0.46        | 0.84        | -0.25             | -0.49        |
| 11.03               | Hydrolysis of anionic and cationic esters             | 0.76        | 0.52        | 0.89        | -0.21             | -0.41        |
| 11.08               | Hydrolysis of esters of inorganic acids               | 0.80        | 0.60        | 0.83        | -0.11             | -0.21        |
| 12.02               | Hydrolysis of anilides and hydrazides                 | 0.72        | 0.44        | 0.79        | -0.21             | -0.41        |
| <b>Main class 2</b> | <b>Average</b>                                        | <b>0.75</b> | <b>0.51</b> | <b>0.84</b> | <b>-0.19</b>      | <b>-0.38</b> |
| 21.01               | O-glucuronidation of alcohols                         | 0.58        | 0.16        | 0.63        | -0.39             | -0.77        |
| 21.02               | O-glucuronidation of phenols                          | 0.71        | 0.43        | 0.77        | -0.23             | -0.49        |
| 21.03               | O-glucuronidation of carboxylic acids                 | 0.89        | 0.77        | 0.94        | -0.07             | -0.15        |
| 22.01               | N-glucuronidation of linear and cyclic amines         | 0.58        | 0.17        | 0.65        | -0.37             | -0.73        |
| 23.01               | O-sulfonation of phenols                              | 0.72        | 0.44        | 0.80        | -0.22             | -0.44        |
| 24.01               | Nucleophilic additions of glutathione                 | 0.92        | 0.84        | 0.97        | +0.04             | +0.08        |
| 24.02               | Reactions of glutathione addition-elimination         | 0.78        | 0.55        | 0.84        | -0.03             | -0.06        |
| <b>Main class 3</b> | <b>Average</b>                                        | <b>0.74</b> | <b>0.48</b> | <b>0.80</b> | <b>-0.18</b>      | <b>-0.36</b> |



**Table S8:** Descriptors selected by the feature importance analyses for the models developed for the considered subclasses of metabolic reactions in the second round of predictions.

| Subclass ID | Description                                           | Accuracy                                                                                                                         |
|-------------|-------------------------------------------------------|----------------------------------------------------------------------------------------------------------------------------------|
| 01.01       | Oxidations of isolated Csp <sup>3</sup>               | Atm_piS(r), Mol_Dipole, Mol_Lipole, Mol_Mass, Mol_PSA, Mol_LogP                                                                  |
| 01.02       | Oxidations of C in $\alpha$ to an unsaturated system  | Atm_Charge, Atm_piS(r), Mol_Mass                                                                                                 |
| 01.03       | Oxidations of Csp <sup>3</sup> carrying an heteroatom | Atm_Charge, Atm_q(r)-Z(r), Mol_PSA, Mol_LogP, Mol_Volume                                                                         |
| 01.04       | Dehydrogenations                                      | Atm_piS(r), Atm_q(r)-Z(r), Mol_Dipole, Mol_Rotors, Mol_HeavyAtoms, Mol_Improper, Mol_Lipole, Mol_PSA                             |
| 02.01       | Oxidations of aryl compounds                          | Atm_Charge, Atm_Dn(r), Atm_Homo, Mol_Dipole, Mol_Gyrrad, Mol_Lipole, Mol_Mass, Mol_PSA, Mol_LogP, Mol_Volume                     |
| 02.02       | Oxidations of azarenes                                | Atm_Charge, Atm_q(r)-Z(r), Atm_piS(r), Mol_Gyrrad, Mol_HbAcc, Mol_LogP                                                           |
| 02.03       | Oxidations of >C=C<                                   | Atm_Dn(r), Atm_Homo-1, Atm_Homo, Atm_Lumo, Mol_Gyrrad, Mol_LogP                                                                  |
| 03.02       | Hydrogenations of carbonyls                           | Atm_Charge, Atm_q(r)-Z(r), Atm_Lumo+1, Mol_HbAcc, Mol_PSA                                                                        |
| 05.01       | Oxidations of tertiary alkylamines                    | Atm_Charge, Atm_De(r), Atm_piS(r), Mol_Gyrrad                                                                                    |
| 06.01       | Hydroxylations of amines                              | Atm_De(r), Atm_piS(r), Mol_PSA                                                                                                   |
| 07.04       | Oxidations of phenols                                 | Atm_q(r)-Z(r), Atm_piS(r), Mol_Atoms, Mol_Dipole, Mol_LogP                                                                       |
| 08.03       | Oxygenations of sulfides                              | Atm_Charge, Atm_q(r)-Z(r), Atm_Homo, Atm_Lumo, Mol_HbDon                                                                         |
| 11.01       | Hydrolysis of alkyl esters                            | Atm_Charge, Atm_piS(r), Atm_Homo-1, Mol_Improper, Mol_Sas                                                                        |
| 11.03       | Hydrolysis of anionic and cationic esters             | Atm_piS(r), Mol_Improper                                                                                                         |
| 11.08       | Hydrolysis of esters of inorganic acids               | Atm_Charge, Atm_Dn(r), Atm_q(r)-Z(r), Atm_Lumo+1                                                                                 |
| 12.02       | Hydrolysis of anilides and hydrazides                 | Atm_Charge, Atm_piS(r), Mol_HeavyAtoms, Mol_Improper                                                                             |
| 21.01       | O-glucuronidation of alcohols                         | Atm_Charge, Atm_Dn(r), Mol_HbDon, Mol_Improper, Mol_Sav                                                                          |
| 21.02       | O-glucuronidation of phenols                          | Atm_Charge, Atm_Dn(r), Atm_De(r), Atm_q(r)-Z(r), Atm_Homo, Mol_Gyrrad, Mol_HbDon, Mol_Volume, Mol_HeavyAtoms, Mol_PSA, Mol_LogP, |
| 21.03       | O-glucuronidation of carboxylic acids                 | Atm_Charge, Atm_piS(r), Atm_Homo-1                                                                                               |
| 22.01       | N-glucuronidation of linear and cyclic amines         | Atm_Charge, Atm_piS(r), Mol_Gyrrad, Mol_Improper, Mol_PSA                                                                        |
| 23.01       | O-sulfonation of phenols                              | Atm_Charge, Atm_De(r), Atm_Homo, Mol_Gyrrad, Mol_HbDon, Mol_Lipole, Mol_PSA, Mol_Sas                                             |
| 24.01       | Nucleophilic additions of glutathione                 | Atm_Charge, Atm_Dn(r), Atm_piS(r), Atm_Lumo, Mol_Rotors, Mol_Improper, Mol_Ovality                                               |
| 24.02       | Reactions of glutathione addition-elimination         | Atm_Lumo, Atm_Lumo+1, Mol_Atoms, Mol_Dipole, Mol_Gyrrad, Mol_LogP                                                                |
